# Supplementary material
Source: Springer Nature journal article supplement (https://www.springermedizin.de/resource/supplementary/12916_2011_464_MOESM3_ESM.pdf/9599742)

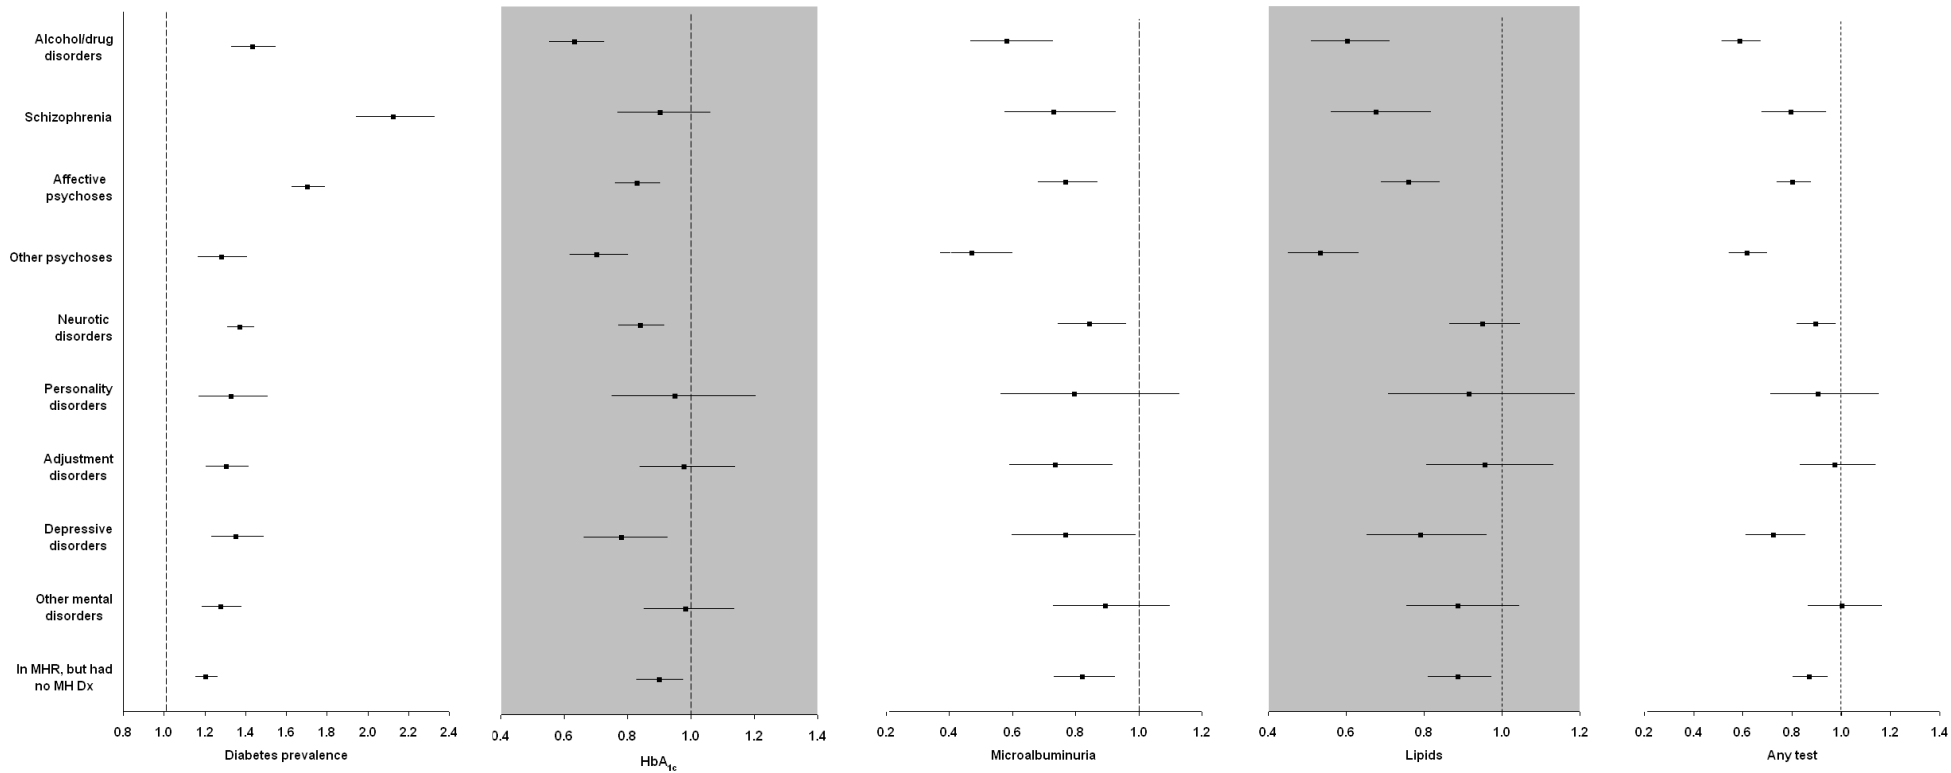

**Adjusted odds ratios**

Supplement: MOESM3 [file 9599742]
